# Supplementary material for: pH-regulative synthesis of Na3(VPO4)2F3 nanoflowers and their improved Na cycling stability
Source: Royal Society of Chemistry journal article supplement (doi:10.1039/c6ta01023g), 2016-01-01
Supplement: c6ta01023g1.pdf [file c6ta01023g1.pdf]

## pH-regulative synthesis of $\text{Na}_3(\text{VPO}_4)_2\text{F}_3$ nanoflowers and their improved Na cycling stability

Yuruo Qi<sup>a,b</sup>, Linqin Mu<sup>c</sup>, Junmei Zhao<sup>a\*</sup>, Yong-Sheng Hu<sup>b,c</sup>, Huizhou Liu<sup>a\*</sup>, Sheng Dai<sup>d</sup>

<sup>a</sup> Key Laboratory of Green Process and Engineering, Institute of Process Engineering, Chinese Academy of Sciences, Beijing 100190, China. Tel: +86-10-82544911. \*E-mail: jmzhao@ipe.ac.cn

<sup>b</sup> University of Chinese Academy of Sciences, Beijing 100049, PR China

<sup>c</sup> Beijing National Laboratory for Condensed Matter Physics, Institute of Physics, Chinese Academy of Sciences, Beijing 100190, China

<sup>d</sup> Chemical Sciences Division, Oak Ridge National Laboratory, Oak Ridge, TN 37831, USA

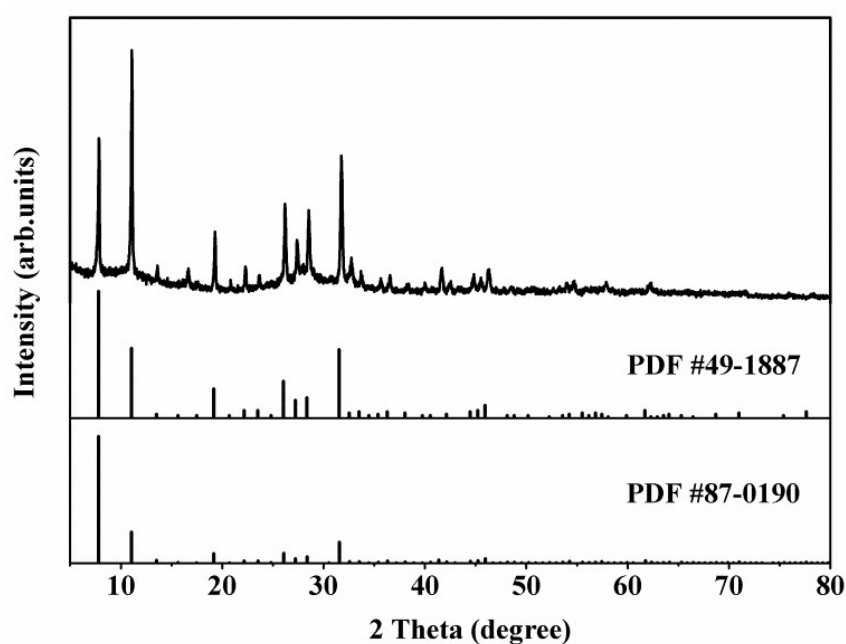

**Fig. S1** XRD patterns of the solid product derived from  $\text{Na}_3\text{PO}_4$  as phosphorus source,

JCPDS card # 49-1887 ( $\text{Na}_{3.44}[(\text{V}_5\text{O}_9)(\text{PO}_4)_2](\text{PO}_4)_{0.08}(\text{OH})_{0.2}\cdot 9\text{H}_2\text{O}$ ) and # 87-0190

( $\text{Na}_{3.053}((\text{V}_5\text{O}_9)(\text{PO}_4)_2)(\text{OH})_{0.1}\cdot 8\text{H}_2\text{O}$ ).

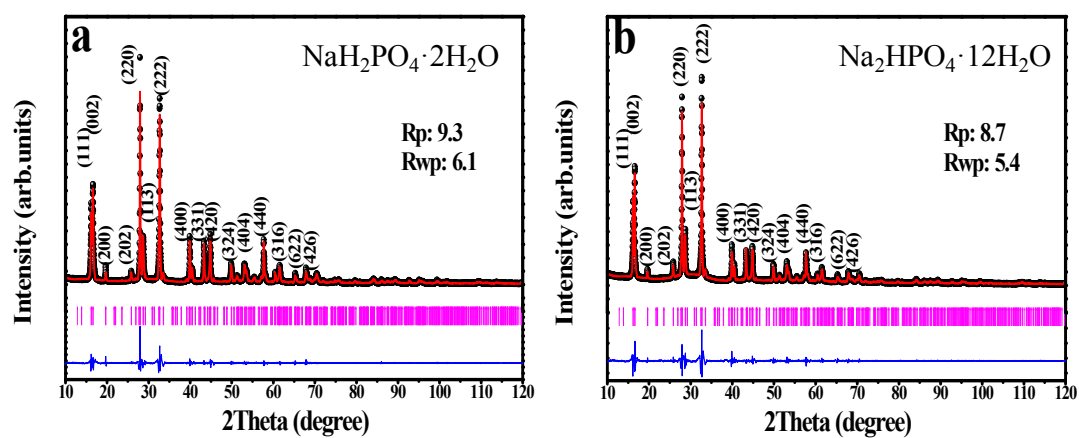

|                    | $\text{NaH}_2\text{PO}_4\cdot 2\text{H}_2\text{O}$ | $\text{Na}_2\text{HPO}_4\cdot 12\text{H}_2\text{O}$ |
|--------------------|----------------------------------------------------|-----------------------------------------------------|
| a(Å)               | 9.03535(7)                                         | 9.03181(6)                                          |
| b(Å)               | 9.03535(7)                                         | 9.03181(6)                                          |
| c(Å)               | 10.69549(6)                                        | 10.68671(6)                                         |
| V(Å <sup>3</sup> ) | 873.2                                              | 871.8                                               |
| Space Group        | P42/mnm                                            | P42/mnm                                             |
| Crystal System     | Tetragonal                                         | Tetragonal                                          |

**Fig. S2** The fitted profiles of  $\text{Na}_3(\text{VPO}_4)_2\text{F}_3$  prepared by  $\text{NaH}_2\text{PO}_4 \cdot 2\text{H}_2\text{O}$  (a) and  $\text{Na}_2\text{HPO}_4 \cdot 12\text{H}_2\text{O}$  (b) and the corresponding fitted lattice parameters. The black (red) line represents the experimental (calculated) data. The residual discrepancy is shown in blue.

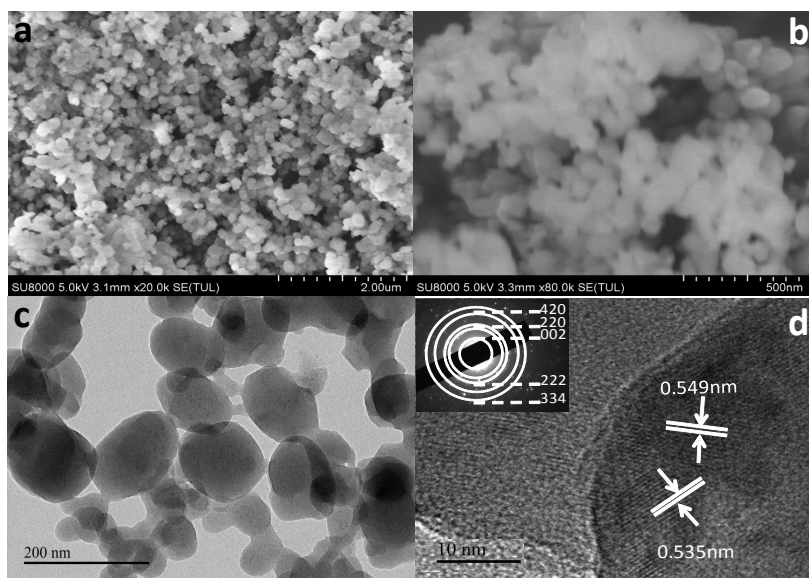

**Fig. S3** Typical SEM images at the different magnifications (a-c), typical high-magnification TEM (HRTEM) image and corresponding SAED pattern (d) for  $\text{Na}_3(\text{VPO}_4)_2\text{F}_3$  nanoparticles using  $\text{Na}_2\text{HPO}_4 \cdot 12\text{H}_2\text{O}$  as phosphorus source.

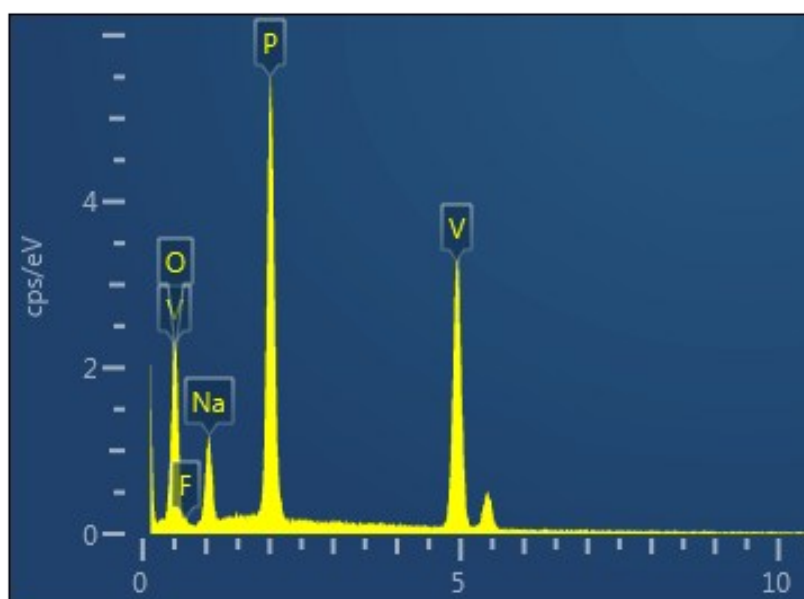

**Fig. S4** EDS analysis of the product at 0 h taking  $\text{NaH}_2\text{PO}_4 \cdot 2\text{H}_2\text{O}$  as phosphorus source.

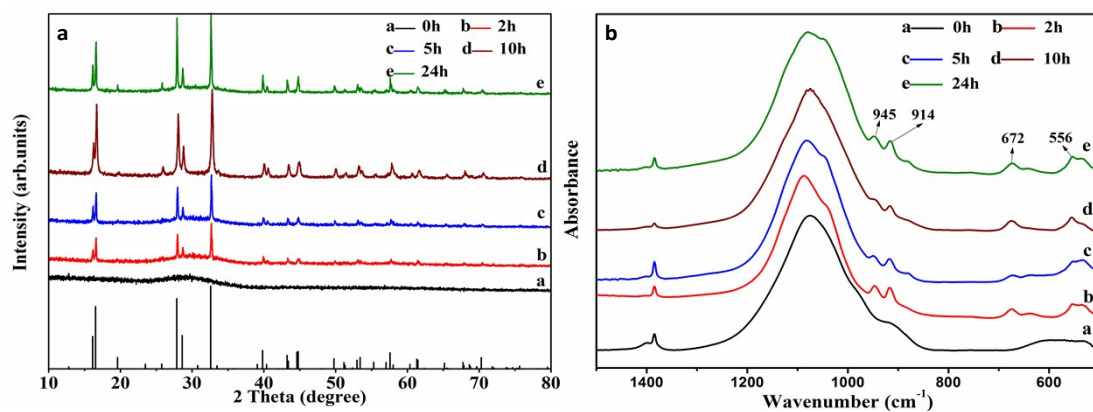

**Fig. S5** (a) XRD patterns and (b) FTIR spectra of the products taking  $\text{Na}_2\text{HPO}_4 \cdot 12\text{H}_2\text{O}$  as phosphorus source with a different hydro-thermal time.

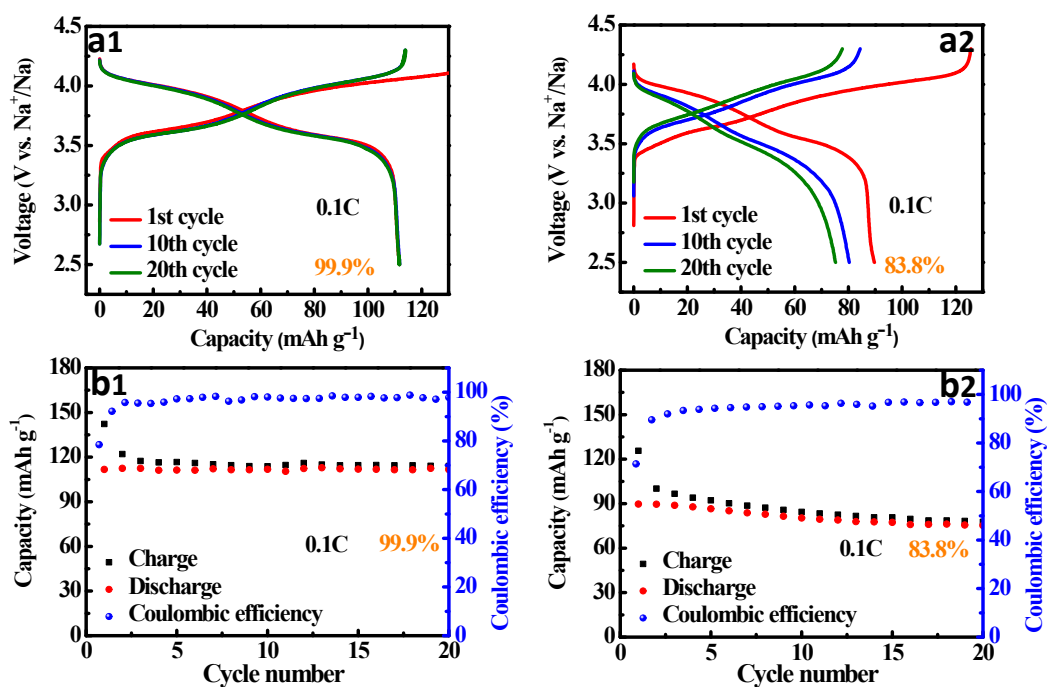

**Fig. S6** Comparison of Na-storage properties between  $\text{Na}_3(\text{VPO}_4)_2\text{F}_3$  nanoflower (1) prepared by  $\text{NaH}_2\text{PO}_4 \cdot 2\text{H}_2\text{O}$  and  $\text{Na}_3(\text{VPO}_4)_2\text{F}_3$  nanoparticles (2) prepared by  $\text{Na}_2\text{HPO}_4 \cdot 12\text{H}_2\text{O}$ . Galvanostatic charge and discharge curves (a); The cycling performance and Coulombic efficiency at a current rate of 0.1C (b).
